# Supplementary material for: Process Evaluations for the Scale-Up of Complex Interventions – a Scoping Review
Source: PubMed Central journal article supplement (PMC11546072; doi:10.5334/ijic.7600), 2024-11-08
Supplement: ijic-24-4-7600-s1.pdf [file ijic-24-4-7600-s1.pdf]

Annex 1: Characteristics of included studies about the complex health interventions of, scale-up frameworks, process evaluation methods and outcomes.

| Study characteristics      |           |                                               | Complex Health Intervention                                                                                                                                                                                                                            |                                                                                            |                                            |                                      | Scale-up                                                                                                                 |                                                                                                                                                                                                                                    |                                                                                                                                                                     | Process evaluation                                                                                                                                                                                                                                                                                                                                                                                                                |                                                                                                                                                                                                |
|----------------------------|-----------|-----------------------------------------------|--------------------------------------------------------------------------------------------------------------------------------------------------------------------------------------------------------------------------------------------------------|--------------------------------------------------------------------------------------------|--------------------------------------------|--------------------------------------|--------------------------------------------------------------------------------------------------------------------------|------------------------------------------------------------------------------------------------------------------------------------------------------------------------------------------------------------------------------------|---------------------------------------------------------------------------------------------------------------------------------------------------------------------|-----------------------------------------------------------------------------------------------------------------------------------------------------------------------------------------------------------------------------------------------------------------------------------------------------------------------------------------------------------------------------------------------------------------------------------|------------------------------------------------------------------------------------------------------------------------------------------------------------------------------------------------|
| Studies<br>(n = 56)        | Country   | Country('s)<br>income<br>classification<br>** | Description of CHI                                                                                                                                                                                                                                     | Target population for<br>CHI                                                               | Health<br>problem<br>targeted <sup>s</sup> | Scale-up<br>dimensions<br>(P, I, C)^ | Framework<br>used                                                                                                        | Key scale-up<br>strategies<br>identified                                                                                                                                                                                           | Process<br>evaluation<br>methods                                                                                                                                    | Process evaluation<br>sample / sources                                                                                                                                                                                                                                                                                                                                                                                            | Reported<br>process<br>evaluation<br>outcomes                                                                                                                                                  |
| Ajayi et al<br>2008 [17]   | Nigeria   | LM                                            | Artemisinin-based<br>combination therapy in<br>the context of home<br>management of<br>Malaria                                                                                                                                                         | Forty rural<br>communities within the<br>Onaara government<br>area                         | CD                                         | I, C                                 | n/a                                                                                                                      | - Adoption into<br>national policy<br><br>- Training to build<br>capacity<br>(community<br>medicine<br>distributors)<br><br>- Financial<br>incentives                                                                              | Focus-group<br>discussions (n =<br>10) within<br>randomly<br>stratified selected<br>community<br>representatives,<br>supplemented by<br>key informant<br>interviews | Three groups of<br>young mothers and<br>old mothers each,<br>and two of young<br>fathers and old<br>fathers each, were<br>involved in the FGD<br>while three patient<br>medicine sellers,<br>four opinion/<br>community leaders,<br>and two health<br>workers were<br>interviewed during<br>the key informant<br>interviews.                                                                                                      | - Feasibility<br><br>- Accessibility<br><br>- Safety                                                                                                                                           |
| Allen et al.<br>2023 [18]  | Australia | HIC                                           | EDDIE+: education<br>and training of all<br>nursing and personal<br>care workers (PCWs);<br>use of decision support<br>tools; use of diagnostic<br>equipment for clinical<br>assessment and<br>monitoring; and<br>facilitation and clinical<br>support | Elderly                                                                                    | Prevention                                 | P, C                                 | Integrated<br>Promoting<br>Action on<br>Research<br>Implementatio<br>n in Health<br>Services (i-<br>PARIHS)<br>framework | - Implementation<br>toolkit and<br>refinements to<br>intervention and<br>decision support<br>tool<br><br>- Training and<br>facilitation<br>(intervention<br>specific)<br><br>- Resource support<br>(e.g., diagnostic<br>equipment) | Environmental<br>scan (outer<br>context),<br>organizational and<br>local RAC home<br>context<br>assessments,<br>intervention<br>working group                       | A review of relevant<br>programs and<br>policies nationally,<br>and evidence<br>relating to hospital<br>avoidance and the<br>aged care sector; The<br>organizational level<br>context assessment<br>was carried out<br>virtually by the nurse<br>educator (EDDIE +<br>study team)<br><br>and key clinical<br>executives from the<br>aged care provider;<br>The local context<br>assessments were<br>conducted in 11<br>RAC homes. | - Identify needs<br>for intervention<br>refinements<br><br>- Barriers and<br>facilitators to<br>implementation<br><br>- Strategies to<br>overcome barriers<br>(e.g., decision<br>support tool) |
| Arrossi et al<br>2017 [19] | Argentina | HIC                                           | Human papillomavirus<br>self-collection through<br>community health<br>workers at home visits                                                                                                                                                          | Women aged 30+<br>attending public health<br>services without a<br>cervical screening test | Prevention,<br>NCD                         | P, I                                 | RE-AIM and<br>adaptation of<br>health system<br>framework                                                                | - Training of<br>community health<br>workers<br><br>- Quality                                                                                                                                                                      | Scale-up was<br>nested within the<br>Jujuy<br>demonstration                                                                                                         | Thee linked data<br>sources were used:<br>Public Health Care<br>census (2013), the<br>SITAM (national                                                                                                                                                                                                                                                                                                                             | - Drivers for<br>scale-up<br><br>- Effectiveness                                                                                                                                               |

|                         |                                 |              |                                                                                                                                                                                        |                     |                      |         |     |                                                                                                                                     |                                                                                                                                                                                                                                                                                                                                                                                                                                     |                                                                                                                                                                                                                                                                                                                |                                                                                                                                                                                                                                                   |
|-------------------------|---------------------------------|--------------|----------------------------------------------------------------------------------------------------------------------------------------------------------------------------------------|---------------------|----------------------|---------|-----|-------------------------------------------------------------------------------------------------------------------------------------|-------------------------------------------------------------------------------------------------------------------------------------------------------------------------------------------------------------------------------------------------------------------------------------------------------------------------------------------------------------------------------------------------------------------------------------|----------------------------------------------------------------------------------------------------------------------------------------------------------------------------------------------------------------------------------------------------------------------------------------------------------------|---------------------------------------------------------------------------------------------------------------------------------------------------------------------------------------------------------------------------------------------------|
|                         |                                 |              |                                                                                                                                                                                        | in the past 5 years |                      |         |     | improvement refreshment training                                                                                                    | project.<br>- Analysis of the scaling-up process using an adaptation of the Health System Framework (HSF); four domains (stewardship, organizational capacity, technology/strategy, Funding).<br>Analysis based on content analysis of program reports and observation derived from participation in policy definition.<br><br>- Analysis of dimensions proposed by RE-AIM through quantitative analysis using routine data sources | information system), and a self-administered questionnaire requested from all involved CHWs.                                                                                                                                                                                                                   | retention<br>- Acceptance<br>- Adoption<br>- Implementation barriers                                                                                                                                                                              |
| Bennett et al 2017 [20] | Afghanistan, Bangladesh, Uganda | LIC, LIC, LM | Three case-examples of quality improvement interventions (community scorecard, technology supported decision guides, and package of interventions to support maternal health services) | Rural poor          | MCH, NCD, Management | P, I, C | n/a | - Adoption into policy (Afghanistan)<br><br>- Quality improvement collaboration and coordination to facilitate institutionalization | Four dimensions of scale-up conceptualized: attributes of the innovation or service, attributes of the target community and actors involved in scale-up, context, and scaling-up strategy. Drawing primarily on project documentation the author sought to describe these four dimensions for the three study                                                                                                                       | Project documentation including research proposals, theories of change, country presentations at annual meetings, routine monitoring reports, annual reports, country publications including articles and policy briefs. Triangulation was supported by sharing the analysis with the country teams for input. | - Attributes of the innovation or service (appropriateness, fidelity)<br><br>- Attributes of the target community and actors involved (acceptability, intention to adopt, coverage)<br><br>- Context (feasibility)<br><br>- Scaling-up strategies |

|                          |                |     |                                                                                                                                                                                                                          |                                                       |            |         |                                                                                  |                                                                                                                                       | contexts                                                                                                                                                                                                                                                                                                                                                                                       | (implementation cost, sustainability)                                                                                                                                      |                                                                                                                                                                                                              |
|--------------------------|----------------|-----|--------------------------------------------------------------------------------------------------------------------------------------------------------------------------------------------------------------------------|-------------------------------------------------------|------------|---------|----------------------------------------------------------------------------------|---------------------------------------------------------------------------------------------------------------------------------------|------------------------------------------------------------------------------------------------------------------------------------------------------------------------------------------------------------------------------------------------------------------------------------------------------------------------------------------------------------------------------------------------|----------------------------------------------------------------------------------------------------------------------------------------------------------------------------|--------------------------------------------------------------------------------------------------------------------------------------------------------------------------------------------------------------|
| Benton et al. 2022 [21]  | United Kingdom | HIC | Healthy living; A digital self-management intervention that has demonstrated effectiveness is Healthy Living for People With Type 2 Diabetes (HeLP-Diabetes), mainly consisting of a theory- and evidence-based website. | Patients with Type 2 Diabetes                         | NCD        | P, I, C | n/a                                                                              | - Adoption of intervention as National Health Service as part of routine care<br><br>- Technical assistance (externally commissioned) | Content analysis of healthy living service (i.e. website in beta version) available. Qualitative interviews                                                                                                                                                                                                                                                                                    | Stakeholders with high-level involvement and with a variety of roles in HeLP diabetes or Healthy Living (e.g., academic researchers, content developers, program managers) | - Fidelity<br><br>- Fidelity drift (reasons for)<br><br>- Describe content and features of intervention delivery following national roll-out                                                                 |
| Bottorff et al 2021 [22] | Canada         | HIC | Healthy Together program designed to engage families in an interactive program to support healthy lifestyles                                                                                                             | Caregivers and their children (up to 18 years of age) | Prevention | P, I    | RE-AIM framework                                                                 | - Training of facilitators<br><br>- Support knowledge mobilization framework<br><br>- Support policy changes                          | External university-led evaluation based on RE-AIM framework using consolidated participant surveys for children, youth, caregivers and facilitators as well as observation checklist to assess implementation fidelity.<br><br>Interviews were held with directors of participating organizations and members of the national advisory committee.<br><br>Social return on investment analysis | Program participants, program facilitators, national advisory committee.                                                                                                   | - Reach<br><br>- Adoption / changes in program delivery<br><br>- Implementation<br><br>- Effectiveness<br><br>- Maintenance<br><br>- Identify new opportunities to extend impact<br><br>- Develop strategies |
| Brien et al. 2023 [23]   | India          | LM  | Enabling Inclusion app to support rehabilitation specialists and community rehabilitation workers to screen, assess, and                                                                                                 | Children with disabilities                            | MCH        | P, C    | Monitoring, evaluation, and learning (MEL) system based on the '5 aspirations of | - Cultivation of partnerships with policy makers<br><br>- Licensing app to other NGOs                                                 | Embedded program indications, including program staff / stakeholder use, demographic and socio-                                                                                                                                                                                                                                                                                                | Program staff / stakeholders, children with disabilities and caregivers, NGO program managers, funders, service                                                            | - Evaluation of an implementation strategy (Monitoring, Evaluation and Learning system) on scale-up                                                                                                          |

|                         |                |     |                                                                                                                                                                                                                                                                                 |                                  |     |      |                                                                               |                                                                           |                                                                                                                                                                                                                                                                                                                                                                                        |                                                                         |                                                                                                                                                     |
|-------------------------|----------------|-----|---------------------------------------------------------------------------------------------------------------------------------------------------------------------------------------------------------------------------------------------------------------------------------|----------------------------------|-----|------|-------------------------------------------------------------------------------|---------------------------------------------------------------------------|----------------------------------------------------------------------------------------------------------------------------------------------------------------------------------------------------------------------------------------------------------------------------------------------------------------------------------------------------------------------------------------|-------------------------------------------------------------------------|-----------------------------------------------------------------------------------------------------------------------------------------------------|
|                         |                |     | monitor progress of children with developmental disabilities, especially in rural areas, and to provide child rehab service providers (e.g., therapists, community rehab workers, NGO management, and caretakers) with a menu of evidence-based, family-centered interventions. |                                  |     |      | Measurement for Change                                                        | - Form knowledge partnerships with government institutions                | economic indicators of end-users, children development screening information, access to care services, and others); key performance indicators per program site (e.g., type of impairment, program adherence rates); qualitative and quantitative methods feedback from NGO program managers, funders, service providers, beneficiaries, public sector policymakers, and the community | providers, policy makers and broader community.                         | (reach).                                                                                                                                            |
| Bright et al. 2023 [24] | Sierra Leone   | LIC | Implementation of Community Blood Pressure monitoring in Rural Africa: Detection of underlying pre-Eclampsia (CRADLE) vital signs alert device with a training package for healthcare professionals                                                                             | Women (at risk of) Pre-eclampsia | MCH | C    | NASSS (non-adoption, abandonment, scale-up, spread, sustainability) Framework | - Train the trainers model<br><br>- Provision of implementation materials | An existing database of training registers, held by the implementing organization, was used to calculate the proportion of facilities trained per district; Focus Group Discussions were held. Analysis was primarily deductive, using the domains of the NASSS Framework as a priori themes                                                                                           | Champions in the four selected districts,                               | - Identify inter-district variation in adoption<br><br>- Factors impacting adoption<br><br>- Provide guidance to avoid non-adoption and abandonment |
| Brunton et al 2022 [25] | United Kingdom | HIC | ABC care bundle for patients with stroke, including rapid anticoagulant reversal,                                                                                                                                                                                               | Patients with Stroke             | NCD | I, C | i-PARIHS                                                                      | - External facilitation team<br><br>- Set-up of internal quality          | Semi-structured interviews, non-participant observation at                                                                                                                                                                                                                                                                                                                             | External facilitators, internal project teams, and clinicians; seventy- | - Prospective changes in implementation<br><br>- Clinicians'                                                                                        |



|                            |           |     |                                                                                                                     |                               |                |         |                                                                                                                                                                                                                        |                                                                                                                                                                                                                                                                                                        |                                                                                                                                                      |                                                                                                                                                                                                                        |                                                                                                                                |
|----------------------------|-----------|-----|---------------------------------------------------------------------------------------------------------------------|-------------------------------|----------------|---------|------------------------------------------------------------------------------------------------------------------------------------------------------------------------------------------------------------------------|--------------------------------------------------------------------------------------------------------------------------------------------------------------------------------------------------------------------------------------------------------------------------------------------------------|------------------------------------------------------------------------------------------------------------------------------------------------------|------------------------------------------------------------------------------------------------------------------------------------------------------------------------------------------------------------------------|--------------------------------------------------------------------------------------------------------------------------------|
|                            |           |     | borne viruses and sexually transmissible infections in indigenous populations.                                      |                               |                |         |                                                                                                                                                                                                                        |                                                                                                                                                                                                                                                                                                        | workers, as well as 33 Aboriginal and Torres Strait Islander clients                                                                                 | implementation (using RE-AIM)                                                                                                                                                                                          |                                                                                                                                |
| Cintyamina et al 2021 [29] | Indonesia | UM  | Polio immunization                                                                                                  |                               | CD             | P, I, C | WHO ExpandNet; CFIR                                                                                                                                                                                                    | <ul style="list-style-type: none"> <li>- Planning: develop scaling up target output and innovation</li> <li>- Identifying user organization and resource team</li> <li>- Analysing environment</li> <li>- Deciding and implementing strategic planning</li> <li>- Monitoring and evaluation</li> </ul> | Document review (grey literature), survey questionnaire, and qualitative analysis were conducted to describe context and the polio program timeline. | Key informant interviews with main actors on polio eradication program at both national and sub-national level. Survey responses from 323 program participants (>1 year exposure)                                      | <ul style="list-style-type: none"> <li>- Program challenges</li> <li>- Strategies</li> <li>- Lessons learned</li> </ul>        |
| Dolan et al. 2023 [30]     | Kenya     | LM  | Table-based Electronic Immunization Registry (EIR) with clinical decision support features.                         | Childhood immunization        | Prevention, CD | C       | Expanded usability heuristics based on Miller et al. 2018                                                                                                                                                              | <ul style="list-style-type: none"> <li>- Cascade training approach</li> <li>- Development of a WhatsApp based peer-support network</li> </ul>                                                                                                                                                          | Qualitative data through structured interviews at 12 purposefully selected user sites and direct workflow observations                               | Unclear (“users”)                                                                                                                                                                                                      | <ul style="list-style-type: none"> <li>- Mechanisms of integration</li> <li>- Development of refined program theory</li> </ul> |
| Fikree et al 2020 [31]     | Ethiopia  | LIC | Long-acting reversible contraception – implants and intrauterine devices – in youth friendly one-stop-shop services | Youth at family planning unit | Prevention, CD | P, I    | <p>Bespoke analytic framework drawn from various sources comprising</p> <ul style="list-style-type: none"> <li>- Stakeholder engagement</li> <li>- Roles and responsibilities</li> <li>- Policy environment</li> </ul> | <ul style="list-style-type: none"> <li>- Training of Youth Friendly service providers</li> <li>- Training of peer-educators to debunk myths about services</li> </ul>                                                                                                                                  | Face-to face semi-structured key informant interviews and data extraction from the Health Management Information System family planning registers    | Senior managers (n = 25) and technical staff (n = 31) from 2 sources (public sector and implementing partners).<br><br>Data extraction from public sector family planning registers maintained at eight health centres | <ul style="list-style-type: none"> <li>- Facilitating factors</li> <li>- Challenges</li> <li>- Barriers</li> </ul>             |

|                         |              |    |                                                                                                                                                                       |                                               |     |         |                                                                                                                            |                                                                                                                                                                      |                                                                                                                                                                             |                                                                                                                                                                                             |                                                                                                                                                                       |
|-------------------------|--------------|----|-----------------------------------------------------------------------------------------------------------------------------------------------------------------------|-----------------------------------------------|-----|---------|----------------------------------------------------------------------------------------------------------------------------|----------------------------------------------------------------------------------------------------------------------------------------------------------------------|-----------------------------------------------------------------------------------------------------------------------------------------------------------------------------|---------------------------------------------------------------------------------------------------------------------------------------------------------------------------------------------|-----------------------------------------------------------------------------------------------------------------------------------------------------------------------|
|                         |              |    |                                                                                                                                                                       |                                               |     |         | - Financial resources                                                                                                      |                                                                                                                                                                      |                                                                                                                                                                             |                                                                                                                                                                                             |                                                                                                                                                                       |
|                         |              |    |                                                                                                                                                                       |                                               |     |         | - Quality of voluntary family planning services                                                                            |                                                                                                                                                                      |                                                                                                                                                                             |                                                                                                                                                                                             |                                                                                                                                                                       |
|                         |              |    |                                                                                                                                                                       |                                               |     |         | - Data availability and use                                                                                                |                                                                                                                                                                      |                                                                                                                                                                             |                                                                                                                                                                                             |                                                                                                                                                                       |
| Fischer et al 2019 [32] | South Africa | UM | NurseConnect; a platform based on the Integrated Behavioural Model and Adult Learning Theory of change aimed to support nurses and midwives in maternal and childcare | Nurses and midwives in maternal and childcare | MCH | P, I    | n/a                                                                                                                        | - Quality improvement collaboration                                                                                                                                  | Focus group discussions or in-depth interviews at 18 randomly selected facilities.                                                                                          | Nurses and midwives (n = 110) registered on NurseConnect                                                                                                                                    | - To optimize user experience<br>- To inform expansion of NurseConnect                                                                                                |
| Georgeu et al 2012 [33] | South Africa | UM | Nurse-initiated and managed antiretroviral treatment; streamlining tasks and roles to expand treatment and care for HIV (STRETCH)                                     | Patients with HIV/AIDS                        | CD  | P, I, C | Assessment of the fidelity of the implementation of the intervention under study                                           | - Educational outreach training/train the trainer to train model [34]                                                                                                | In-depth interviews, focus group discussions, data observations                                                                                                             | Patients, health workers, health managers, and other key informants                                                                                                                         | - Perceptions of task-shifting model<br>- Changes in health provider roles<br>- Attitudes and patient relationships<br>- Impact of context on implementation outcomes |
| Gong et al 2021 [35]    | China        | UM | Primary-care-based integrated mobile health intervention (SINEMA) for patients with Stroke                                                                            | Patients with Stroke                          | NCD | P, I, C | RE-AIM / MRC process evaluation framework<br><br>The RE-AIM framework was used to inform the measurement of implementation | - Training of village doctors<br>- Performance-based financial support<br>- Virtual-group peer support<br>- Development of digital infrastructure to support program | Process evaluation alongside a type 2 hybrid implementation trial in 50 rural villages<br><br>Multiple data collection approaches were adopted, including self-administered | Stakeholders (qualitative), village doctors (quantitative). Stakeholders included patients who suffered stroke, village doctors, physicians at township hospitals, and a county coordinator | - Implementation indicators<br>- Enablers<br>- Barriers<br>- Potential impact pathways that affect effectiveness                                                      |

|                            |              |     |                                                                                                                                                                                                                                            |                                                                |            |   |                                                                                                                                                                    |                                                                                                                                                                               |                                                                                                                                                                                    |                                                                     |                                                                                                                  |
|----------------------------|--------------|-----|--------------------------------------------------------------------------------------------------------------------------------------------------------------------------------------------------------------------------------------------|----------------------------------------------------------------|------------|---|--------------------------------------------------------------------------------------------------------------------------------------------------------------------|-------------------------------------------------------------------------------------------------------------------------------------------------------------------------------|------------------------------------------------------------------------------------------------------------------------------------------------------------------------------------|---------------------------------------------------------------------|------------------------------------------------------------------------------------------------------------------|
|                            |              |     |                                                                                                                                                                                                                                            |                                                                |            |   | n outcomes, covering program reach, adoption, implementation, and maintenance.                                                                                     | delivery                                                                                                                                                                      | surveys among village doctors, face-to-face interview-based surveys among participants, monitoring data from the digital health system, and in-depth interviews among stakeholders |                                                                     |                                                                                                                  |
|                            |              |     |                                                                                                                                                                                                                                            |                                                                |            |   | The MRC process evaluation framework was used to investigate the interactive relationship between context, intervention components, and implementation indicators. |                                                                                                                                                                               |                                                                                                                                                                                    |                                                                     |                                                                                                                  |
| Hargreaves et al 2010 [36] | South Africa | UM  | Intervention with Microfinance for AIDS and Gender Equity (IMAGE). Multi-component intervention including poverty-focused microfinancing facilitated by a fieldworker, gender and HIV/AIDS awareness training, and community mobilization. | Patients with HIV / AIDS                                       | CD         | P | n/a                                                                                                                                                                | - Change in delivery model from “linked” to “parallel”<br>- Policy alignment<br>- Activities to promote collaboration<br>- Staff recruitment and training (by existing staff) | Semi-structured interviews.<br><br>Finance monitoring systems provided data on loan repayment                                                                                      | Manager, field staff, trial client, and scale-up client interviews. | - Feasibility<br>- Acceptability                                                                                 |
| Hollis et al. 2022 [37]    | Australia    | HIC | Train-the-trainer model for scaling-up a “health conversations skills (HCS) training”; HCS training uses an interactive, participatory approach to learning built on the pedagogy of active learning, with the trainer modelling the       | Health professionals engaged in behaviour change conversations | Prevention | P | Taxonomy of Behaviour Change Techniques / Theoretical Domains Framework                                                                                            | - Train the trainer                                                                                                                                                           | Pre-post training surveys                                                                                                                                                          | Health conversation skills trainees                                 | - Perceived barriers and facilitators in delivering the intervention based on the Theoretical Domains Framework. |



HCS philosophy and skills throughout.

|                               |                |     |                                                                                                                                                                                                              |                                |               |         |                                                                                                               |                                                                                                                                                                                                                                                                                                  |                                                                                                                                                                                      |                                                                  |                                                                                                                                                           |
|-------------------------------|----------------|-----|--------------------------------------------------------------------------------------------------------------------------------------------------------------------------------------------------------------|--------------------------------|---------------|---------|---------------------------------------------------------------------------------------------------------------|--------------------------------------------------------------------------------------------------------------------------------------------------------------------------------------------------------------------------------------------------------------------------------------------------|--------------------------------------------------------------------------------------------------------------------------------------------------------------------------------------|------------------------------------------------------------------|-----------------------------------------------------------------------------------------------------------------------------------------------------------|
| Holroyd-Leduc et al 2019 [38] | Canada         | HIC | Mobilization of Vulnerable Elders (MOVE) intervention; an interprofessional approach that focuses on early and consistent mobilization of older adults admitted to hospital.                                 | Elderly admitted to hospital   | R             | P, I, C | Select, Tailor, Plan and Engage (STEP) tool based on theoretical domains framework                            | <ul style="list-style-type: none"> <li>- Initiation of site-implementation teams</li> <li>- Benchmarking / quality improvement through a bespoke online tool for monitoring and evaluation</li> <li>- Implementations support tool based on sustainability findings</li> </ul>                   | Completion of NHS sustainability survey                                                                                                                                              | Four participating units                                         | <ul style="list-style-type: none"> <li>- Changes in the climate of sustainability</li> <li>- Identify additional sustainability considerations</li> </ul> |
| Hunt et al 2020 [39]          | United Kingdom | HIC | Gender-Sensitized Weight Management and Healthy Living Program                                                                                                                                               | Overweight men                 | Prevention    | P, I, C | PRACTical planning for Implementation and Scale-up (PRACTIS)                                                  | <ul style="list-style-type: none"> <li>- Easy-access license shifting to single license model</li> <li>- Transfer ownership</li> <li>- Training program to train new coaches / clubs (train the trainers package)</li> <li>- Creating a support structure to enable quality assurance</li> </ul> | Comparison of baseline data between post-RCT participant metrics (socio-demographic, weight, waist circumference, blood pressure) and scaled-up routine program participant metrics. | Data from 42 Scottish professional football league participants. | <ul style="list-style-type: none"> <li>- Reach</li> <li>- Retention of effectiveness</li> <li>- Scale-out adaptations</li> </ul>                          |
| Hyam et al. 2024 [40]         | United Kingdom | HIC | A trans-diagnostic service model and care package for young people aged 16–25 years with a recent onset eating disorder that is 3 years or less in duration. FREED encourages rapid access to treatment that | Patients with eating disorders | Mental health | P, C    | RE-AIM and Non-adoption, Abandonment, and Challenges to Scale-Up, Spread and Sustainability (NASSS) framework | <ul style="list-style-type: none"> <li>- Integration in national adoption and spread program</li> <li>- Regional implementation specialist' support</li> </ul>                                                                                                                                   | Individual structured interviews according NASSS complexity assessment tool                                                                                                          | National program leads                                           | - Perceived sustainability of the model                                                                                                                   |

|                          |                                          |                 |                                                                                              |                                                |     |         |                                                                            |                                                                                                                                                                                                                                                                                                                      |                                                                                                                                                           |                                                                                                                                                                                               |                                                                                                                                                                  |
|--------------------------|------------------------------------------|-----------------|----------------------------------------------------------------------------------------------|------------------------------------------------|-----|---------|----------------------------------------------------------------------------|----------------------------------------------------------------------------------------------------------------------------------------------------------------------------------------------------------------------------------------------------------------------------------------------------------------------|-----------------------------------------------------------------------------------------------------------------------------------------------------------|-----------------------------------------------------------------------------------------------------------------------------------------------------------------------------------------------|------------------------------------------------------------------------------------------------------------------------------------------------------------------|
|                          |                                          |                 | is well-coordinated, evidence-based, and adapted to young people's needs                     |                                                |     |         |                                                                            |                                                                                                                                                                                                                                                                                                                      |                                                                                                                                                           |                                                                                                                                                                                               |                                                                                                                                                                  |
| Irungu et al 2021 [41]   | Kenya                                    | LM              | Integration of PrEP services into routine clinical practice.                                 | Patients with HIV / AIDS at public HIV clinics | CD  | I, C    | The expanded framework for reporting adaptations and modifications (FRAME) | <ul style="list-style-type: none"> <li>- Training of health care providers through project staff</li> <li>- Technical assistance and mentorship</li> <li>- Sharing of best-practices</li> <li>- Summary reports benchmarking service delivery one-year post initiation</li> </ul>                                    | Semi-structured interviews                                                                                                                                | Health care providers at selected public HIV clinics, including clinical officers, nurses, social workers, and counsellors.                                                                   | <ul style="list-style-type: none"> <li>- Identify real-world mechanisms of implementation</li> <li>- Adaptations to context to support implementation</li> </ul> |
| Kauchali et al 2022 [42] | South Africa, Bolivia, Malawi, and Ghana | UM, LM, LIC, LM | Four quality improvement cases based on WHO guidelines for severe acute malnutrition.        | Children with severe acute malnutrition        | MCH | P, I, C | n/a                                                                        | <ul style="list-style-type: none"> <li>- Participatory approach to capacity building</li> <li>- Policy adaptation (local and national)</li> <li>- Evaluation of data for action and advocacy</li> <li>- Train the trainer (champions)</li> <li>- High-level team to link intervention to insurance system</li> </ul> | Contemporaneous implementation reports, qualitative and quantitative data from our research papers, and our prospective and retrospective data collection | Four country studies of scaling up implementation of WHO guidelines for improving the inpatient management of severe acute malnutrition within under- resourced public sector health services | <ul style="list-style-type: none"> <li>- Identification of key factors informing successful scale-up</li> <li>- Lessons learned</li> </ul>                       |
| Kenis et al. 2023 [43]   | Belgium                                  | HIC             | Self-directed co-creation of a care pathway for patients treated with oral anticancer drugs. | Patients with Cancer                           | NCD | I, C    | n/a                                                                        | <ul style="list-style-type: none"> <li>- Shifting ownership / self-directed approach</li> <li>- External coaching at group level</li> <li>- Supportive tools</li> <li>- Creation of a learning</li> </ul>                                                                                                            | Semi-structured interviews                                                                                                                                | Project coordinators, project members,                                                                                                                                                        | <ul style="list-style-type: none"> <li>- Influencing factors for successful scale-up</li> </ul>                                                                  |

|                          |              |     |                                                                                                                                                                                                          |                                                                                    |     |         |                                                                                             |                                                                                                                                                                                                                                                                                                           |                                                                                                                                                                                                  |                                                                                                                                                                           | community                                                                                                                                                                                                                            |
|--------------------------|--------------|-----|----------------------------------------------------------------------------------------------------------------------------------------------------------------------------------------------------------|------------------------------------------------------------------------------------|-----|---------|---------------------------------------------------------------------------------------------|-----------------------------------------------------------------------------------------------------------------------------------------------------------------------------------------------------------------------------------------------------------------------------------------------------------|--------------------------------------------------------------------------------------------------------------------------------------------------------------------------------------------------|---------------------------------------------------------------------------------------------------------------------------------------------------------------------------|--------------------------------------------------------------------------------------------------------------------------------------------------------------------------------------------------------------------------------------|
| Kinney et al. 2023 [44]  | South Africa | UM  | Perinatal audit program                                                                                                                                                                                  |                                                                                    | MCH | I, C    | Health policy analysis triangle framework                                                   | <ul style="list-style-type: none"> <li>- Guidelines for institutionalization</li> <li>- Incentives for ongoing professional development</li> <li>- Intentional and continuous demonstration of impact</li> <li>- Continuous implementation support</li> <li>- Assembly of a national committee</li> </ul> | 56 individual interviews, a systematic document review, administration of a semi-structured questionnaire, and 10 nonparticipant observations of meetings related to the perinatal audit program | Key informants at different health system levels (e.g., national, provincial, regional, subdistrict, facility, primary health care) and stratified by subdistrict (n = 5) | <ul style="list-style-type: none"> <li>- Historical mapping / lessons learned</li> </ul>                                                                                                                                             |
| Lafferty et al 2021 [45] | Australia    | HIC | The Test Treat AND GO (TTANGO) trial; sexually transmissible infections point-of-care testing in remote communities.                                                                                     | Remote / rural indigenous populations                                              | CD  | P, I, C | Increasing the scale of population health interventions: A Guide / Acceptability Framework. | Unclear                                                                                                                                                                                                                                                                                                   | Semi-structured interviews                                                                                                                                                                       | 15 healthcare workers (including nurses and Aboriginal health practitioners) and five managers (including clinic coordinators and practice managers).                     | <ul style="list-style-type: none"> <li>- Acceptability</li> <li>- Barriers to integration</li> <li>- Enablers</li> </ul>                                                                                                             |
| Liu et al 2020 [46]      | Canada       | HIC | 10-week MEND behaviour change program focusing on increasing physical activity, reducing sedentary behaviour and promoting healthy eating using practical and engaging activities to deliver information | Children and adolescents aged 7 – 13 with a BMI $\geq$ 85 <sup>th</sup> percentile | MCH | P       | RE-AIM                                                                                      | - Capacity building                                                                                                                                                                                                                                                                                       | Stakeholder interviews, leader feedback surveys, document review, and participant feedback surveys. This process evaluation was embedded with a Type 3 hybrid implementation trial.              | Stakeholders, participants, parents, program staff across 27 sites                                                                                                        | <ul style="list-style-type: none"> <li>- Reach</li> <li>- Attendance</li> <li>- Fidelity</li> <li>- Acceptability</li> <li>- Satisfaction</li> <li>- Facilitators / Challenges to implementation</li> <li>- Effectiveness</li> </ul> |
| Low et al 2021 [47]      | Malaysia     | UM  | Enhanced Primary Health Care (EnPHC) Initiative including the deployment of triage counters, introduction                                                                                                | Twenty primary health care clinics across two states in Malaysia                   | NCD | P, I, C | n/a                                                                                         | - Infrastructure development (triage counters, introduction of care coordinator                                                                                                                                                                                                                           | Structured observation, self-reported assessment form, and in-depth                                                                                                                              | Clinic liaison officers at the 20 primary health care clinics; Interviews conducted with 20                                                                               | <ul style="list-style-type: none"> <li>- Fidelity</li> <li>- Feasibility</li> </ul>                                                                                                                                                  |

|                           |              |     |                                                                                    |                          |         |         |                                                            |                                                                                                                                          |                                                                                                   |                                                                                                                                                                                                                                                                                                                                                                                                  |                                                                                                                                                                                                                                                                                                                             |
|---------------------------|--------------|-----|------------------------------------------------------------------------------------|--------------------------|---------|---------|------------------------------------------------------------|------------------------------------------------------------------------------------------------------------------------------------------|---------------------------------------------------------------------------------------------------|--------------------------------------------------------------------------------------------------------------------------------------------------------------------------------------------------------------------------------------------------------------------------------------------------------------------------------------------------------------------------------------------------|-----------------------------------------------------------------------------------------------------------------------------------------------------------------------------------------------------------------------------------------------------------------------------------------------------------------------------|
|                           |              |     | of care coordinator role, NCD screening, NCD risk management, and referral systems |                          |         |         |                                                            | role)                                                                                                                                    | interviews.                                                                                       | health care professionals purposefully selected across different staff categories,                                                                                                                                                                                                                                                                                                               | - Adaptation<br>- Benefit                                                                                                                                                                                                                                                                                                   |
| MacGregor et al 2018 [48] | South Africa | UM  | Antiretroviral Therapy adherence clubs                                             | Patients with HIV / AIDS | CD      | P, I, C | Complex adaptive system lens underlying process evaluation | - Acquisition of funding<br>- Institution of model as policy by provincial government<br>- Recognition of impact<br>- Advocacy on impact | Observations, interviews, evaluation of key adherence club documents, and routine monitoring data | Patient, nurses, doctors, HIV counsellors, pharmacist and pharmacy assistant, data clerk, facility managers and ARV program heads, club coordinator, NGO representatives, government stakeholders (total n = 45)                                                                                                                                                                                 | - Planned organizational change through intervention in a state health system<br>- describing and analysing the core elements necessary for rolling out the club model to new clinics, and for scaling up the number of clubs within a particular facility<br>- Challenges and enablers in bringing the innovation to scale |
| Marsh et al. 2014 [49]    | Ethiopia     | LIC | Integrated community-based case management                                         | Non-disease specific     | unclear | C       | n/a                                                        | - Quality of care benchmarking evaluation                                                                                                | Consensus-based evaluation of 70 different benchmarks against observations                        | Six national experts currently engaged in documenting Ethiopia's iCCM experience and an observer. Experts included two Health Specialists from UNICEF, two advisors from John Snow International's Last 10 Kilometres (L10K) Project, a Save the Children Senior Newborn Health Advisor seconded to the Federal Ministry of Health, and an advisor to the United States Agency for International | - Integrated case management performance against benchmarks across different phases of implementation (including scale-up)                                                                                                                                                                                                  |

|                          |           |     |                                                                                                                                                  |                 |            |         |                                                                         |                                                                                       |                                                                                                                                                                                                                                   |                                                                                                                                                                     |                                                                                                                                                                                      |
|--------------------------|-----------|-----|--------------------------------------------------------------------------------------------------------------------------------------------------|-----------------|------------|---------|-------------------------------------------------------------------------|---------------------------------------------------------------------------------------|-----------------------------------------------------------------------------------------------------------------------------------------------------------------------------------------------------------------------------------|---------------------------------------------------------------------------------------------------------------------------------------------------------------------|--------------------------------------------------------------------------------------------------------------------------------------------------------------------------------------|
|                          |           |     |                                                                                                                                                  |                 |            |         |                                                                         |                                                                                       |                                                                                                                                                                                                                                   | Development's Integrated Family Health Program. The newly joined Child Health Team Leader of the Federal Ministry of Health was the observer.                       |                                                                                                                                                                                      |
| Mary et al 2019 [50]     | Niger     | LIC | Three interventions to reduce post-partum hemorrhage: misoprostol, uterine balloon tamponade, non-pneumatic anti-shock garment.                  | Pregnant women  | MCH        | P, I, C | n/a                                                                     | - Cascade training<br>- Nationwide procurement                                        | Mixed methods approach including cross-sectional health facility assessments, including provider interviews, and household surveys                                                                                                | A total of 69 health facilities: two national tertiary hospitals; seven regional tertiary hospitals; 12 district secondary hospitals; and 48 primary health centres | - Evaluate program implementation (rates)<br><br>- Evaluate training and capacity to provide post-partum haemorrhage according to guidelines (i.e. fidelity)                         |
| McInnes et al. 2024 [51] | Australia | HIC | Nurse-led, evidence-based protocols to manage fever, hyperglycemia and swallowing protocols following stroke through cascade facilitation model. | Stroke          | NCD        | P       | n/a                                                                     | - Cascade facilitation                                                                | Qualitative process evaluation                                                                                                                                                                                                    | Executive / Steering committee members, Angel team leaders, angel consultants, country coordinators.                                                                | - Factors that influenced stakeholder engagement during scale-up<br><br>- Barriers and facilitators that affect implementation<br><br>- Participants' role in the project / scale-up |
| McLaughlin 2021 [52]     | Australia | HIC | Physical Activity 4 Everyone (PA4E1) seven school physical activity practices                                                                    | School children | Prevention | P, I, C | Framework for Reporting Adaptations and Modifications -Enhanced (FRAME) | - Package of seven implementation support strategies including 23 sub-strategies [53] | A list of adaptations was generated from a comparison of the efficacy and scale-up trials via published PA4E1 protocols, trial registrations and information provided by trial investigators. Monthly trial team meetings tracked | n/a                                                                                                                                                                 | - Modifications during scale-up (extend, types, reasons)                                                                                                                             |

|                          |        |     |                                                                                                                                                                                                                                                                                                   |                             |       |         |     |                                                                                                                                                                                                                                                                                                                                                                                             |                                                                                                                                                                                    |                                                                                                                                                                                                                                                  |                                                                                                                                                                                                                                 |
|--------------------------|--------|-----|---------------------------------------------------------------------------------------------------------------------------------------------------------------------------------------------------------------------------------------------------------------------------------------------------|-----------------------------|-------|---------|-----|---------------------------------------------------------------------------------------------------------------------------------------------------------------------------------------------------------------------------------------------------------------------------------------------------------------------------------------------------------------------------------------------|------------------------------------------------------------------------------------------------------------------------------------------------------------------------------------|--------------------------------------------------------------------------------------------------------------------------------------------------------------------------------------------------------------------------------------------------|---------------------------------------------------------------------------------------------------------------------------------------------------------------------------------------------------------------------------------|
|                          |        |     |                                                                                                                                                                                                                                                                                                   |                             |       |         |     |                                                                                                                                                                                                                                                                                                                                                                                             | and coded modifications in “real-time” during the conduct of the scale-up trial. The extent, type and reasons for both adaptations and modifications were summarized descriptively |                                                                                                                                                                                                                                                  |                                                                                                                                                                                                                                 |
| Morgan et al 2022 [54]   | Canada | HIC | Rural primary care-based memory clinics                                                                                                                                                                                                                                                           | People with dementia        | NCD R | P, I, C | n/a | <ul style="list-style-type: none"> <li>- Feedback on impact through research data</li> <li>- Dissemination of project findings as advocacy tool (supporting professional academic development)</li> <li>- Clinical support to teams</li> <li>- Regular working group and check-in meetings</li> <li>- Matching of new members with mentors</li> <li>- Ongoing education sessions</li> </ul> | Focus-group interviews (n = 6; 40 participants), workgroup meetings (n = 15; 100 participants)                                                                                     | Health care providers involved in the design and delivery of the memory clinics, including family physician, occupation therapist, nurses, social work, physiotherapist, dietician, care coordinator, clinic facilitator, manager, office staff. | <ul style="list-style-type: none"> <li>- Perspectives of factors influencing sustainability and scale-up</li> </ul>                                                                                                             |
| Mubanga et al. 2023 [55] | Zambia | LM  | The tele-mentoring Extension for Community Healthcare Outcomes (ECHO); The ECHO model uses videoconference technology to create virtual communities of practice that allow providers to care for patients with complicated health problems, which they would otherwise refer to a higher level of | Patients with HIV and/or TB | CD    | P       | n/a | <ul style="list-style-type: none"> <li>- Train the trainer model (“each expert contributes to the development of 20 health care workers)</li> <li>- Community of practice</li> </ul>                                                                                                                                                                                                        | Health worker survey, focus group discussion, evaluation of routine monitoring and reporting systems for key performance indicators                                                | Interviews with HIV / TB patients (n = 8* 12); survey of 88 health care workers.                                                                                                                                                                 | <ul style="list-style-type: none"> <li>- Elicit common experiences</li> <li>- Emergent patterns at impact, knowledge, practice level, as well as factors enabling and hindering ECHO implementation in each province</li> </ul> |

| care.                                                        |              |     |                                                                                          |                                              |            |         |                                                                                                           |                                                                                                                                                                                                                                                                                       |                                                                                                                                                      |                                                                                                                |                                                                                                                      |
|--------------------------------------------------------------|--------------|-----|------------------------------------------------------------------------------------------|----------------------------------------------|------------|---------|-----------------------------------------------------------------------------------------------------------|---------------------------------------------------------------------------------------------------------------------------------------------------------------------------------------------------------------------------------------------------------------------------------------|------------------------------------------------------------------------------------------------------------------------------------------------------|----------------------------------------------------------------------------------------------------------------|----------------------------------------------------------------------------------------------------------------------|
| Mulat et al 2022 [56]                                        | Ethiopia     | LIC | Community-based health insurance scheme                                                  | Public                                       | Prevention | P, I    | n/a                                                                                                       | - Expand eligibility as part of national, government-driven, scale-up                                                                                                                                                                                                                 | Semi-structured interviews                                                                                                                           | Eighteen stakeholders working on health financing and health insurance                                         | - Success factors (or good practices) to scale up<br><br>- Major challenges to scale-up                              |
| Napierala et al. 2019 [57]                                   | Zimbabwe     | LM  | HIV self-testing program through distribution in outreach sites / clinics                | HIV / AIDS                                   | CD         | P       | n/a                                                                                                       | - Peer educators<br><br>- Co-location within government facilities<br><br>- Discreet locations<br><br>- Staff – patient engagement training                                                                                                                                           | Analysis of routine program data, focus group discussions                                                                                            | Female sex workers, peer-educators, and service providers                                                      | - Identify additional approaches to HIV self-testing<br><br>- Identify reasons for non-self-testing / access to care |
| Naughton et al. / Sharma et al. / Wamuti et al. 2023 [58–60] | Kenya        | LM  | Assisted partner service (notification for sexual partners of people diagnosed with HIV) | Patients with HIV / AIDS and sexual partners | CD         | P, I    | Theoretical framework of acceptability                                                                    | - Training<br><br>- Provision of manuals<br><br>- Monitoring and evaluation                                                                                                                                                                                                           | Phone-based in-depth interviews                                                                                                                      | Female patients with HIV and male sexual partners                                                              | - Acceptability                                                                                                      |
| Niang et al. 2023 [61]                                       | Burkina Faso | LIC | Seasonal malaria chemoprevention (SMC)                                                   | Malaria                                      | CD         | P, I, C | An integrative conceptual framework of scale-up and sustainability of social innovations in global health | - Cascade facilitation<br><br>- Support from technical and financial partners<br><br>- Follow-up and supervision across various hierarchical levels<br><br>- Using human resources from various health systems<br><br>- Logistical support, training, communication, monitoring tools | Maximum variation sampling to obtain the broadest range of perspectives for individual interviews; in addition, documentary analysis and observation | Stakeholders at different scales of innovation implementation at national, regional or location organizations. | - Interconnectedness processes underpinning<br><br>Innovation, sustainability and scaling up in time and space.      |

|                                   |         |     |                                                                                                                                                                                                                                                                |                            |                    |      |                                                                                                                                      |                                                                                                                                                                    |                                                                                                                                                                                                                                                  |                                                                                                                                                                   |                                                                                                                                                                           |
|-----------------------------------|---------|-----|----------------------------------------------------------------------------------------------------------------------------------------------------------------------------------------------------------------------------------------------------------------|----------------------------|--------------------|------|--------------------------------------------------------------------------------------------------------------------------------------|--------------------------------------------------------------------------------------------------------------------------------------------------------------------|--------------------------------------------------------------------------------------------------------------------------------------------------------------------------------------------------------------------------------------------------|-------------------------------------------------------------------------------------------------------------------------------------------------------------------|---------------------------------------------------------------------------------------------------------------------------------------------------------------------------|
|                                   |         |     |                                                                                                                                                                                                                                                                |                            |                    |      |                                                                                                                                      | - Create synergy between different actors                                                                                                                          |                                                                                                                                                                                                                                                  |                                                                                                                                                                   |                                                                                                                                                                           |
| Nsangi et al 2019 [62]            | Uganda  | LIC | Informed health choices primary school resources aimed at teaching children how to assess trustworthiness of claims about the effects of treatment.                                                                                                            | Primary school children    | Prevention         | P, I | Bespoke framework based on review of existing frameworks and studies of barriers and facilitators to implementing change at schools. | Unclear                                                                                                                                                            | Qualitative data using lesson evaluation forms, observation, individual interviews and focus group interviews                                                                                                                                    | Lesson evaluation forms and classroom observations across 60 primary schools. Interviews with district education officers, head teachers, teachers, and children. | - Identify factors affecting the implementation, impact and scaling up of the intervention<br><br>- Identify potential adverse and beneficial effects of the intervention |
| Oladeji et al. 2023 [63]          | Nigeria | LM  | Training of trainers to support the scale-up of WHO Mental Health Gap Action Program Intervention Guide                                                                                                                                                        | Perinatal depression       | Mental Health, MCH | P, C | Replication Effective Framework (REP)                                                                                                | - Development of an intervention guide<br><br>- Train the trainers                                                                                                 | The training sessions facilitated by these trainers were observed and rated for fidelity by specialist trainers, while the trainees provided their impression of and satisfaction with the training sessions using predesigned assessment forms. | Participants of refresher trainings 7 months post initial cascade training initiation.                                                                            | - Experiences of provider with delivering care<br><br>- Identify areas of deficiencies<br><br>- Retention in knowledge and attitudes                                      |
| Pichon et al 2021 [64]            | USA     | HIC | Community-based, accessible, PrEP navigation services; client navigators provide individualized support for clients to access medical and social services, promote reengagement in care, maintain medication adherence, and keep track of medical appointments | Patients with HIV / AIDS   | CD                 | P, I | n/a                                                                                                                                  | - Integration into national HIV/AIDS strategy and regional strategy<br><br>- Employment of PrEP navigators<br><br>- Training<br><br>- Ongoing technical assistance | In-depth qualitative interviews                                                                                                                                                                                                                  | In 2018, nine PrEP navigators were interviewed; in 2019, five of the original navigators were interviewed again.                                                  | - To determine facilitators and barriers to the implementation of the Memphis-based Project PrIDE PrEP navigation activities.<br><br>- Define best practices              |
| Puchalski Ritchie et al 2021 [65] | Malawi  | LIC | Implementation strategy (cascade training) to provide lay health workers with the knowledge, skills and tools needed to                                                                                                                                        | Patients with Tuberculosis | CD                 | P, I | RE-AIM                                                                                                                               | - Educational outreach through peer educators<br><br>- Peer support network                                                                                        | Interviews; document review of training logs, quarterly meeting notes, field visit reports, and study                                                                                                                                            | Lay health workers, peer-trainers, and patients/guardians                                                                                                         | - Reach<br><br>- Adoption<br><br>- Implementation                                                                                                                         |



|                             |                |     |                                                                                                                                                                    |                                                                                |            |         |                              |                                                                                                                                                                                                                                           |                                                                                                                                                                                                                                                                                                                         |                                                                                                                                                      |                                                                                                                                                                                  |
|-----------------------------|----------------|-----|--------------------------------------------------------------------------------------------------------------------------------------------------------------------|--------------------------------------------------------------------------------|------------|---------|------------------------------|-------------------------------------------------------------------------------------------------------------------------------------------------------------------------------------------------------------------------------------------|-------------------------------------------------------------------------------------------------------------------------------------------------------------------------------------------------------------------------------------------------------------------------------------------------------------------------|------------------------------------------------------------------------------------------------------------------------------------------------------|----------------------------------------------------------------------------------------------------------------------------------------------------------------------------------|
|                             |                |     | implement an intervention to support patient tuberculosis (TB) treatment adherence                                                                                 |                                                                                |            |         |                              | - Clinical support tool                                                                                                                                                                                                                   | team member meeting notes                                                                                                                                                                                                                                                                                               |                                                                                                                                                      | - Maintenance<br><br>- Barriers and facilitators to implementation, scalability and sustainability.<br><br>- Suggestions for program improvement                                 |
| Redwood et al. 2023 [66]    | United Kingdom | HIC | Intervention to protect preterm infants from neurodevelopmental disabilities.                                                                                      | Preterm infants at risk of neurodevelopmental disabilities.                    | MCH        | I, C    | Normalization Process Theory | - Quality improvement toolkit<br><br>- Implementation guide<br><br>- Regional training<br><br>- Regional support<br><br>- Local champions with funded dedicated time<br><br>- Learning and celebration events<br><br>- Collateral funding | Interviews conducted with key individuals in leadership positions across 150 maternity units                                                                                                                                                                                                                            | Those providing quality improvement related leadership and regional clinical leads providing clinical leadership to units in their region.           | - How different implementation contexts and perinatal team dynamics — frequently lost in accounts of barriers and facilitators — generated the observed implementation outcomes. |
| Renju et al 2010-11 [67–69] | Tanzania       | LIC | School-based, teacher-led, peers-supported, youth-friendly services for adolescent sexual and reproductive health intervention scaled-up through training cascade. | School-based adolescents at risk for sexual and reproductive health challenges | Prevention | P, I, C | n/a                          | - Training cascade from regional through district and ward level to the schools<br><br>- Training guides                                                                                                                                  | Observation of teacher training sessions (coverage, attendance, selection, motivation, experiences, attitudes, perceptions, characteristics, ownership, training content and delivery, levels of support, logistics and other external factors); self-administered questionnaires; interviews, focus-group discussions, | Academic teachers, District trainers and supervisors, guardian teacher, head teacher, regional trainers and supervisors, ward education coordinator. | - Facilitators<br><br>- Inhibitors<br><br>- Teacher attitudes and experiences                                                                                                    |

|                           |          |     |                                                                                                                                                                                                                                                       |                                                                                 |            |         |                                                                                                                                                                                                                                                                  |                                                                                                         |                                                                                                                                                                                | unstructured interviews                                                                                                                                                      |                                                                                                                                      |
|---------------------------|----------|-----|-------------------------------------------------------------------------------------------------------------------------------------------------------------------------------------------------------------------------------------------------------|---------------------------------------------------------------------------------|------------|---------|------------------------------------------------------------------------------------------------------------------------------------------------------------------------------------------------------------------------------------------------------------------|---------------------------------------------------------------------------------------------------------|--------------------------------------------------------------------------------------------------------------------------------------------------------------------------------|------------------------------------------------------------------------------------------------------------------------------------------------------------------------------|--------------------------------------------------------------------------------------------------------------------------------------|
| Rhodes et al 2020 [70]    | USA      | HIC | Evidence-based community-level intervention designed to increase HIV and STI prevention behaviours among Spanish-speaking.                                                                                                                            | Heterosexual Latinx men who are members of recreational soccer teams in the US. | Prevention | I       | Scale-up and Spread framework                                                                                                                                                                                                                                    | - Training of navigators                                                                                | Archival data and individual / small-group interviews. Archival data included partnership meeting notes, progress reports, conference presentations and biweekly meeting notes | Project coordinator supervisors, executive directors, financial managers, development directors, and board members at two time points.                                       | - To examine the implementation process mapped on the 12 Scale-up and Spread constructs.                                             |
| Sako et al 2018 [71]      | Ethiopia | LIC | Community-based grain bank intervention;                                                                                                                                                                                                              | Children at risk of severe malnutrition                                         | MCH        | P, I, C | A framework describing six elements of successful scaling up: socio-political context, attributes of the intervention, attributes of the implementers, appropriate delivery strategy, the adopting community, and use of research to inform the scale-up process | - Establishment of performance indicators<br>- Integration in existing structures<br>- Cascade training | Key informant interviews and 31 focus group discussions with purposely selected informants across 8 (out of 180) localities)                                                   | Government officials at national, regional and local level, UNICEF, NGO representatives, University stakeholders, Agricultural sector, health sector, and community members. | - Enablers<br>- Barriers                                                                                                             |
| Sivakumar et al 2022 [72] | Canada   | HIC | eHealth intervention to individualize diabetes care priorities for patients through interactive goal setting, as well as to support an interprofessional team in navigating the complex guideline recommendations of diabetes through shared decision | Patients with Diabetes                                                          | NCD        | P, I    | Normalization Process Theory                                                                                                                                                                                                                                     | Unclear                                                                                                 | Individual end-user interviews and a single focus-group discussion. Thematic analysis framework applied to identify construct interactions                                     | End-user participants; focus group discussion within ministry of health.                                                                                                     | - Factors critical to scale-up<br>- Adaptability<br>- Compatibility with similar innovations<br>- Consistency with policy directives |

|                         |                |     |                                                                                                                                                                                                                                                                                                                          |                                                  |                           |         |        |                                                                                                                                                                                              |                                                                                                                                 |                                                                                                                                                                                                           |                                                                                                                                                                                                                             |
|-------------------------|----------------|-----|--------------------------------------------------------------------------------------------------------------------------------------------------------------------------------------------------------------------------------------------------------------------------------------------------------------------------|--------------------------------------------------|---------------------------|---------|--------|----------------------------------------------------------------------------------------------------------------------------------------------------------------------------------------------|---------------------------------------------------------------------------------------------------------------------------------|-----------------------------------------------------------------------------------------------------------------------------------------------------------------------------------------------------------|-----------------------------------------------------------------------------------------------------------------------------------------------------------------------------------------------------------------------------|
|                         |                |     | making.                                                                                                                                                                                                                                                                                                                  |                                                  |                           |         |        |                                                                                                                                                                                              |                                                                                                                                 |                                                                                                                                                                                                           | - Cost-effectiveness and affordability                                                                                                                                                                                      |
| Spaaij et al. 2023 [73] | Switzerland    | HIC | Problem Management Plus (PM+) - an evidence-based low-intensity psychological intervention delivered by non-specialist "helpers"                                                                                                                                                                                         | Refugees                                         | Mental health             | P, I, C | n/a    | Unclear                                                                                                                                                                                      | Semi-structured interviews                                                                                                      | Syrian refugees who previously participated in intervention, intervention helpers, health professionals working with refugees, and decision makers from migration integration, social and health sectors. | - Factors influencing the process of larger scale implementation<br><br>- Develop recommendations to guide implementation process.                                                                                          |
| Tonnon et al 2016 [74]  | Netherlands    | HIC | Lifestyle intervention (Health Under Construction; HUC); The HUC intervention promotes behavioural change regarding physical activity and a healthy diet through Individual counselling. Employees are screened by an occupational physician for their cardiovascular disease risk during a periodic medical examination | Construction workers (at risk)                   | Prevention                | P, I    | n/a    | - Contracting commercial health services                                                                                                                                                     | Quantitative data using registration sheets, self-report questionnaires, audio-recordings of consultations made by counsellors. | Counsellors, participants / construction workers                                                                                                                                                          | - Components reached<br><br>- Dose received<br><br>- Dose delivered<br><br>- Counsellor competence<br><br>- Satisfaction of counsellors and participants with the intervention<br><br>- Barriers experienced by counsellors |
| Verhey et al. 2022 [75] | Zimbabwe       | LM  | Friendship Bench (FB) is a brief psychological intervention delivered by Community Health Workers - CHWs which has shown effectiveness for predominantly female primary health care clinic users                                                                                                                         | Patients attending primary care clinics          | Prevention, Mental health | P, I, C | RE-AIM | - Formal hand-over to city health department<br><br>- Development of data collection tools to integrate into routine primary health care services<br><br>- Sustain technical supporting role | Review of intervention data / activities at 36 primary health clinics (not reliably available); questionnaire data              | 152 key stakeholders including community health workers, supervisors, nurses in charge, district health promoting officers completed questionnaires.                                                      | - Reach<br><br>- Effectiveness<br><br>- Adoption<br><br>- Implementation                                                                                                                                                    |
| Walker et al 2020 [76]  | United Kingdom | HIC | ESCAPE-pain; an evidence-based intervention integrating education and exercise                                                                                                                                                                                                                                           | Patients with knee / hip pain and osteoarthritis | R                         | P, I, C | RE-AIM | - Adoption of program by Academic Health                                                                                                                                                     | Routine data monitoring to measure outcomes for each of the                                                                     | Outcome data from 3873 patients with osteoarthritis (hip or                                                                                                                                               | - Reach<br><br>- Effectiveness                                                                                                                                                                                              |

|                       |       |    |                                                                                                                                                                                                                                                                                                    |                                       |            |         |      |                                                                                                                                                                                                |                                                                                                                                                                                                |                                                                                   |                                                                                                                 |
|-----------------------|-------|----|----------------------------------------------------------------------------------------------------------------------------------------------------------------------------------------------------------------------------------------------------------------------------------------------------|---------------------------------------|------------|---------|------|------------------------------------------------------------------------------------------------------------------------------------------------------------------------------------------------|------------------------------------------------------------------------------------------------------------------------------------------------------------------------------------------------|-----------------------------------------------------------------------------------|-----------------------------------------------------------------------------------------------------------------|
|                       |       |    | for people with chronic knee and/or hip pain and osteoarthritis, which promotes self-management to improve quality of life and function.                                                                                                                                                           |                                       |            |         |      | Science Networks<br>- Small team to support scale-up including project manager and administrative support<br><br>- National program manager and dedicated resource within each of 15 networks. | RE-AIM domains. Self-reported compliance with the ESCAPE-Pain core components                                                                                                                  | knee)                                                                             | - Adoption<br>- Implementation<br>- Maintenance                                                                 |
| Waqar et al 2013 [77] | Fiji  | UM | A community-based intervention program: Healthy Youth Healthy Communities to increase the capacity of the whole community, including churches, mosques, and temples, to promote healthy eating and regular physical activity, and to prevent unhealthy weight gain in adolescents aged 13–18 years | Adolescents                           | Prevention | P, I, C | n/a  | - Capacity building<br>- Social marketing                                                                                                                                                      | Quantitative data collection using bespoke data collection form about intervention planning, delivery activities, process, dose, reach, people involved, frequency and associated resource use | Unclear                                                                           | - Identification of successful objectives and success factors within broader action plan in relation to context |
| Zhou et al 2022 [78]  | China | UM | Quality improvement program for acute coronary syndromes in hospitals                                                                                                                                                                                                                              | Patients with acute coronary syndrome | NCD        | P, I, C | CFIR | - Implementation of an accreditation program<br>- Uniform guidance on pain centre organization and management<br>- Quality control system                                                      | Semi-structured interviews, partly individual partly focus-group discussions                                                                                                                   | Director and coordinators of multi-stage cluster sampled acute chest pain centres | - Barriers<br>- Facilitators<br>- Strategies to overcome barriers                                               |

\* Navigation is an intervention modelled after existing evidence-informed interventions where client navigators provide individualized support for clients to access medical and social services, promote re-engagement in care, maintain medication adherence, and keep track of medical appointments. \*\* HIC, High-Income Country; LIC, Low-Income Country; LM, Low-Middle-Income Country; UM, Upper-Middle-Income Country; ^Scale-up dimensions: P, increasing population coverage; I, integrating services; and C, increasing comprehensiveness. Abbreviations: CFIR, Consolidated Framework for Implementation Research; RE-AIM, Reach, Effectiveness, Adoption, Implementation, and Maintenance; MRC, Medical Research Council; i-PARIHS, integrated-Promoting Action on Research Implementation in Health Services; NPT, Normalisation Process Theory; PRACTIS guide, PRACTical planning for Implementation and Scale-up;

CAS lens, complex adaptive system lens. <sup>s</sup>health outcome targeted by the CHI: NCD, noncommunicable diseases; CD, communicable diseases; MCH, maternal and child health; and R, rehabilitation.
