# Supplementary material for: Process Evaluations for the Scale-Up of Complex Interventions – a Scoping Review
Source: PubMed Central journal article supplement (PMC11546072; doi:10.5334/ijic.7600), 2024-11-08
Supplement: ijic-24-4-7600-s3.pdf [file ijic-24-4-7600-s3.pdf]

**Supplementary data – Table 1**

| Studies (n=35)             | Description of CHI                                                                                  | Country's income classification     | Country                         | Scale-up or implementation framework used                                                                                                     | Scale-up or implementation framework used                                        | Study design                  | Study population                                                                                                             |
|----------------------------|-----------------------------------------------------------------------------------------------------|-------------------------------------|---------------------------------|-----------------------------------------------------------------------------------------------------------------------------------------------|----------------------------------------------------------------------------------|-------------------------------|------------------------------------------------------------------------------------------------------------------------------|
| Ajayi et al 2008 (27)      | Home management of malaria                                                                          | LM                                  | Nigeria (South-West)            | Feasibility and community perception                                                                                                          | feasibility and community perception                                             | quasi-experimental study      | 40 communities at baseline                                                                                                   |
| Arrossi et al 2017 (17)    | HPV self-collection                                                                                 | H                                   | Argentina (Jujuy Province)      | RE-AIM (7) and adaptation of health system framework                                                                                          | RE-AIM and adaptation of health system framework                                 | RCT                           | women beneficiaries                                                                                                          |
| Bennett et al 2017 (43)    | Community-based intervention                                                                        | L, L, LM                            | Afghanistan, Uganda, Bangladesh | CFIR (44)                                                                                                                                     | CFIR                                                                             | n/a                           | 3 implementation research studies                                                                                            |
| Bottorff et al 2021 (45)   | Intervention targeting obesity in rth America                                                       | H                                   | Canada                          | RE-AIM (7)                                                                                                                                    | RE-AIM framework                                                                 | n/a                           | health promotion healthy together                                                                                            |
| Brunton et al 2022 (46)    | Scale-up of ABC care bundle for stroke                                                              | H                                   | England (Greater Manchester)    | i-PARIHS (47)                                                                                                                                 | i-PARIHS                                                                         | quality improvement project   | scaled-up to two hyperacute stroke units                                                                                     |
| Cintyamena et al 2021 (48) | Scaling up polio eradication                                                                        | LM to UM in the period (UM in 2019) | Indonesia                       | Barker, Reid and Schall (2016) four steps to scaling up (49)                                                                                  | Barker, Reid and Schall (2016) four steps to scaling up                          | n/a                           | polio vaccine recipients                                                                                                     |
| El Joueidi et al 2021 (18) | Digital health tool: WelTel                                                                         | L, H                                | East Africa, Canada             | CFIR (44)                                                                                                                                     | mCFIR                                                                            | digital health tool after RCT | n/a                                                                                                                          |
| Fikree et al 2020 (50)     | long-acting reversible contraceptive (LARC) uptake in YFS                                           | L                                   | Ethiopia                        | Their own one-stop-shop youth-friendly service (YFS) delivery model based on ExpandNet, Yamey, CAS lens, and Breastfeeding Gear model (51–54) | their own one-stop-shop YFS delivery model                                       | n/a                           | 182 YFS units in 4 regions                                                                                                   |
| Fischer et al 2019 (32)    | NurseConnect supporting nurses and midwives in maternal and child health                            | UM                                  | South Africa                    | none                                                                                                                                          | none                                                                             | n/a                           | 18 facilities randomly                                                                                                       |
| Georgeu et al 2012 (19)    | Streamlining Tasks and Roles to Expand Treatment and Care for HIV (STRETCH) Trial task-shifting for | UM                                  | South Africa                    | Assessing fidelity of the implementation of the intervention under study, describing processes, relationships and                             | assessment of the fidelity of the implementation of the intervention under study | RCT                           | task-shifting for HIV/AIDS care from physicians to nurses tested at two kinds of antiretroviral therapy sites, one nurse-led |

|                               |                                                                                         |               |                                                                                              |                                                                                                                                                                                                                                       |                                                                                                                |                                  |                                                                                                                        |
|-------------------------------|-----------------------------------------------------------------------------------------|---------------|----------------------------------------------------------------------------------------------|---------------------------------------------------------------------------------------------------------------------------------------------------------------------------------------------------------------------------------------|----------------------------------------------------------------------------------------------------------------|----------------------------------|------------------------------------------------------------------------------------------------------------------------|
|                               | HIV/AIDS care from physicians to nurses                                                 |               |                                                                                              | contexts involved in CHI delivery, identifying barriers/facilitators with the aim to address black box problems (theory-based PE alongside an RCT of printed educational materials to improve referral and prescribing practices (55) |                                                                                                                |                                  | and one physician-led                                                                                                  |
| Gong et al 2021 (25)          | Primary-care-based integrated mobile health intervention (SINEMA)                       | UM            | China (rural)                                                                                | RE-AIM (7) framework and the MRC process evaluation framework                                                                                                                                                                         | both the RE-AIM framework and the MRC process evaluation framework                                             | 1-year-cluster-RCT               | 25 rural villages, 637 patients                                                                                        |
| Hargreaves et al 2010 (26)    | Intervention with Microfinance for AIDS and Gender Equity (IMAGE) combines microfinance | UM            | South Africa                                                                                 | none                                                                                                                                                                                                                                  | none                                                                                                           | cluster-RCT                      | 430 female clients                                                                                                     |
| Holroyd-Leduc et al 2019 (34) | Mobilization of Vulnerable Elders (MOVE) intervention                                   | H             | Canada (Alberta province)                                                                    | Knowledge to Action (KTA) cycle. (56)                                                                                                                                                                                                 | Knowledge to Action (KTA) cycle. pragmatic, quasi-experimental un-blinded interrupted time series (ITS) design | n/a                              | four community hospitals                                                                                               |
| Hunt et al 2020 (24)          | Football Fans in Training (FFIT) program                                                | H             | Started in the UK, scaled-out to Australia, Canada, New Zealand, England, other EU countries | PRACTIS guide (57)                                                                                                                                                                                                                    | PRACTIS guide                                                                                                  | RCT                              | men aged 35–65 who are at increased risk of future ill-health because of their body size (BMI > 28 kg/m <sup>2</sup> ) |
| Irungu et al 2021 (58)        | PreP integration into routine clinical practice                                         | LM            | Kenya                                                                                        | Framework for Reporting Adaptations and Modifications-Enhanced (FRAME) (59)                                                                                                                                                           | Framework for Reporting Adaptations and Modifications-Enhanced (FRAME)                                         | prospective implementation study | 25 high volume public HIV care clinics                                                                                 |
| Kauchali et al 2022 (29)      | Management of severe acute malnutrition (SAM)                                           | UM, LM, L, LM | South Africa, Bolivia, Malawi, and Ghana                                                     | none                                                                                                                                                                                                                                  | n/a                                                                                                            | case studies                     | 4 country studies of scaling up implementation of WHO guidelines for improving the inpatient management of SAM         |

|                                      |                                                                                     |    |                                                                      |                                                                                     |                                                                                       |                                                                              |                                                                  |
|--------------------------------------|-------------------------------------------------------------------------------------|----|----------------------------------------------------------------------|-------------------------------------------------------------------------------------|---------------------------------------------------------------------------------------|------------------------------------------------------------------------------|------------------------------------------------------------------|
| Lafferty et al 2021 (20)             | The Test Treat ANd GO (TTANGO) trial                                                | H  | Australia (remote Aboriginal and Torres Strait Islander communities) | Milat et al.'s (9) Increasing the scale of population health interventions: A Guide | Milat et al.'s [ref] Increasing the scale of population health interventions: A Guide | RCT                                                                          | 15 HCWs and 5 managers                                           |
| Liu et al 2020 (60)                  | 10-week Mind, Exercise, Nutrition ... Do it! (MEND) British Columbia (B.C.) program | H  | Canada                                                               | RE-AIM (7)                                                                          | RE-AIM                                                                                | prospective pragmatic implementation evaluation                              | 27 sites                                                         |
| Low et al 2021 (38)                  | Enhanced Primary Health Care (EnPHC) Initiative                                     | UM | Malaysia                                                             | Fidelity, feasibility, adaptation and perceived benefit (61,62)                     | fidelity, feasibility, adaptation and perceived benefit                               | complex intervention package                                                 | 20 participating EnPHC clinics                                   |
| MacGregor et al 2018 (63)            | Adherence club antiretroviral therapy                                               | UM | South Africa (Western Cape province)                                 | CAS lens (53)                                                                       | CAS lens                                                                              | adherence club intervention                                                  | City of Cape Town health department                              |
| Mary et al 2019 (64)                 | Postpartum haemorrhage (PPH) interventions                                          | L  | Niger                                                                | none                                                                                | none                                                                                  | national PPH intervention scaled up focusing on three clinical interventions | 69 health facilities                                             |
| Morgan et al 2022 (65)               | Rural memory clinics                                                                | H  | Canada                                                               | none                                                                                | none                                                                                  | qualitative cross-sectional retrospective study                              | four interdisciplinary rural memory clinic teams                 |
| Mulat et al 2022 (36)                | Community-based health insurance (CBHI)                                             | L  | Ethiopia                                                             | none                                                                                | none                                                                                  | community-based health insurance                                             | 13 woredas (districts)                                           |
| Nsangi et al 2019 (35)               | Informed health choices (IHC) project                                               | L  | Uganda                                                               | none                                                                                | none                                                                                  | informed health choices trial                                                | 60 schools                                                       |
| Pichon et al 2021 (66)               | Project PrIDE                                                                       | H  | USA                                                                  | none                                                                                | none                                                                                  | pre-exposure prophylaxis (PrEP) navigation*                                  | 2018: nine PrEP navigators 2019: five of the original navigators |
| Puchalski Ritchie LM et al 2021 (67) | Training rounds to support patient tuberculosis (TB) treatment adherence            | L  | Malawi                                                               | RE-AIM (7)                                                                          | RE-AIM                                                                                | RCT                                                                          | 4 districts in S/E zone of Malawi                                |
| Rhodes et al 2020 (68)               | Community-Based Participatory Research                                              | H  | USA                                                                  | none                                                                                | n/a                                                                                   | n/a                                                                          | beneficiaries                                                    |
| Sako et al 2018 (42)                 | Nutrition education                                                                 | L  | Ethiopia                                                             | Yamey framework (52)                                                                | Yamey framework                                                                       | grain bank                                                                   | Eight study sites                                                |
| Sivakumar et al 2022 (31)            | Patient decision aid tool                                                           | H  | Canada                                                               | NPT (69)                                                                            | NPT                                                                                   | n/a                                                                          | Ontario PHC system                                               |
| Tonnon et al 2016 (22)               | Lifestyle intervention Health Under Construction                                    | H  | The Netherlands                                                      | Steckler and Linnan framework (70) and additional components                        | Steckler and Linnan framework                                                         | RCT                                                                          | Dutch construction workers                                       |
| Walker et al 2020 (23)               | ESCAPE-pain                                                                         | H  | UK                                                                   | RE-AIM (7)                                                                          | RE-AIM                                                                                | complex evidence-based intervention                                          | 110 clinical and non-clinical sites reaching                     |

|                       |                                                                                          |    |                           |                                                                             |       |                                                                                      |                                                                            |
|-----------------------|------------------------------------------------------------------------------------------|----|---------------------------|-----------------------------------------------------------------------------|-------|--------------------------------------------------------------------------------------|----------------------------------------------------------------------------|
|                       |                                                                                          |    |                           |                                                                             |       | underpinned by an RCT and an economic evaluation                                     | over 9000 people with osteoarthritis                                       |
| Waqa et al 2013 (28)  | Healthy Youth Healthy Communities                                                        | UM | Fiji                      | n/a                                                                         | n/a   | multi-faceted community-based interventions in a quasi-experimental design           | adolescents aged 13–18 years                                               |
| Zhou et al 2022 (71)  | quality improvement program for acute coronary syndrome                                  | UM | China                     | CFIR (44)                                                                   | CFIR  | n/a                                                                                  | patients with IHD - in National Chest Pain Centers Program (NCPCP)         |
| Renju et al 2010 (41) | Model youth-friendly services for adolescent sexual and reproductive health intervention | L  | Tanzania (rural)          | none                                                                        | n/a   | multi-component adolescent sexual and reproductive health community-randomized trial | 4 districts, there are 6 hospitals, 24 health centres and 154 dispensaries |
| Renju et al 2010 (39) |                                                                                          | L  | Tanzania (northern)       | Framework for Reporting Adaptations and Modifications-Enhanced (FRAME) (59) | n/a   |                                                                                      | 4 of Mwanza's 8 districts                                                  |
| Renju et al 2011 (40) |                                                                                          | L  | Tanzania (northern)       |                                                                             | n/a   |                                                                                      | schools                                                                    |
| McLaughlin 2021 (37)  | Physical Activity 4 Everyone (PA4E1)                                                     | H  | Australia and New Zealand |                                                                             | FRAME | type III hybrid implementation-effectiveness scale-up trial                          | low-socioeconomic secondary schools (n=49)                                 |

Legend: \*Navigation is an intervention modelled after existing evidence-informed interventions where client navigators provide individualized support for clients to access medical and social services, promote re-engagement in care, maintain medication adherence, and keep track of medical appointments; CFIR, Consolidated Framework for Implementation Research; RE-AIM, Reach, Effectiveness, Adoption, Implementation, and Maintenance; MRC, Medical Research Council; i-PARIHS, integrated-Promoting Action on Research Implementation in Health Services; PRACTIS guide, PRACTical planning for Implementation and Scale-up; CAS lens, complex adaptive system lens
